# Supplementary material
Source: PubMed Central journal article supplement (PMC2654977)
Supplement: supp_179_6_474__1.pdf [file supp_179_6_474__1.pdf]

**Acute lung injury is reduced in *fat-1* mice  
endogenously synthesizing n-3 fatty acids**

**- Online Data Supplement -**

Konstantin Mayer, Almuth Kiessling, Juliane Ott, Martina Barbara Schaefer, Matthias Hecker, Ingrid Henneke, Richard Schulz, Andreas Günther, Jingdong Wang, Lijun Wu, Joachim Roth, Werner Seeger, Jing X. Kang

Figure E1a)

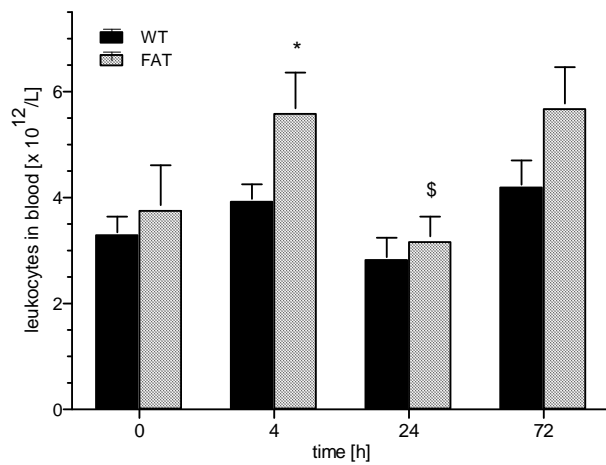

Figure E1b)

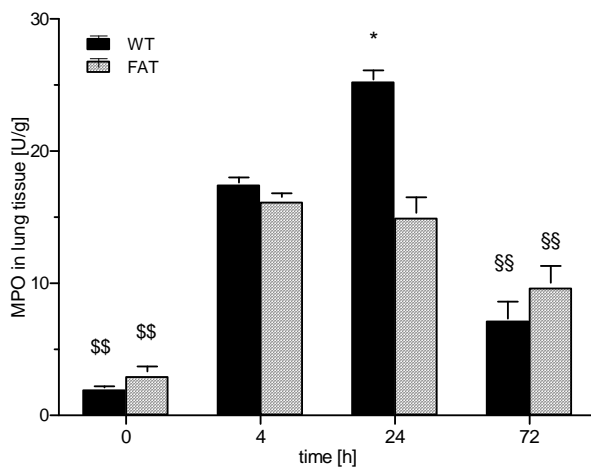

Figure E1: *fat-1* mice, leukocyte in peripheral blood and lung myeloperoxidase (MPO) in a model of acute lung injury.

Wild type (WT) and *fat-1* (FAT) mice were sacrificed before (0), and 4, 24, and 72 h after instillation of 10  $\mu$ g LPS into the trachea. Leukocytes (a) were determined in peripheral blood. After LPS-stimulation, leukocytes increased markedly in *fat-1* mice and differed significantly from WT at 4 h (\*,  $p < 0.05$ ). After dropping at 24 h, a second peak of leukocyte

numbers was found at 72 h in *fat-1* mice. The numbers at 24 h in *fat-1* but not in WT mice differed significantly from those at 4 and 72 h (\$,  $p < 0.05$ ).

MPO levels (b) increased in WT animals reaching a peak at 24 h, and dropped at 72 h. The increase in MPO levels was blunted in *fat-1* mice, and differed significantly from WT at 24 h (\*,  $p < 0.05$ ). The MPO levels at baseline, and at 72 h after LPS instillation, were significantly different from all other time points in both groups (\$\$ and §§,  $p < 0.01$ ).

Figure E2)

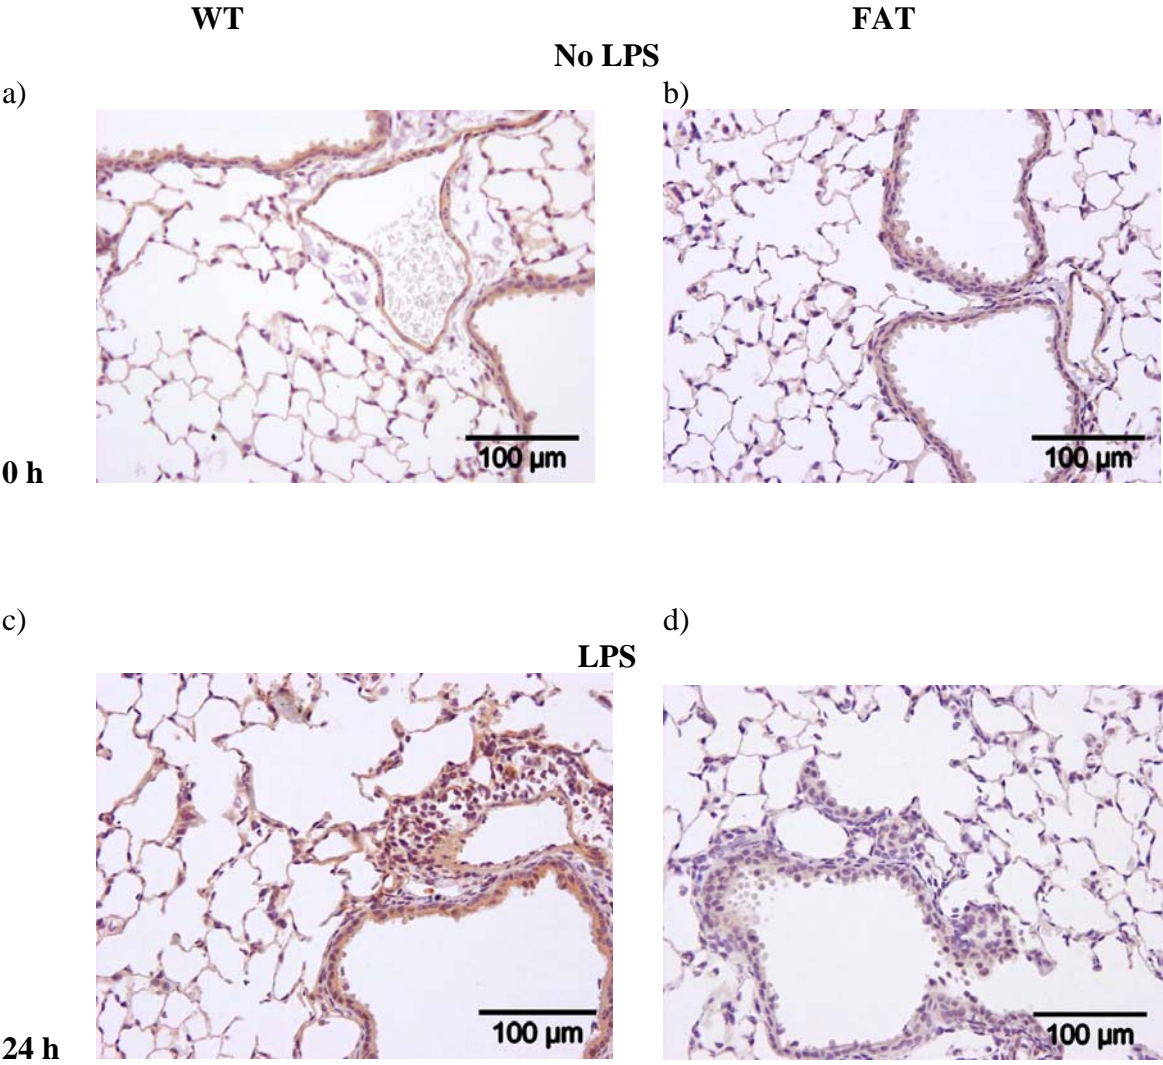

Fig E2 cont.

e)

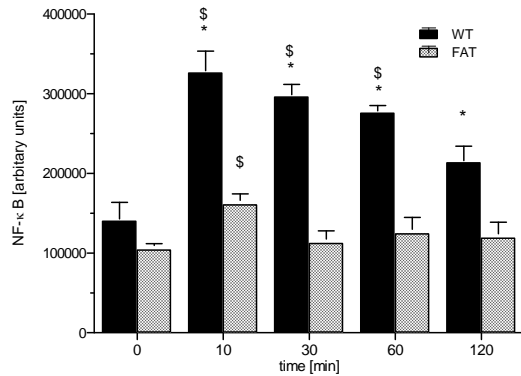

Figure E2: *fat-1* mice and  $NF-\kappa B$  in a model of acute lung injury.

$NF-\kappa B$  was stained in red before (a + b) and 24 h after (c + d) intra-trachea instillation of LPS in wild type (WT, a + c) and *fat-1* mice (b + d). Staining was detected in bronchial epithelium and endothelial cells and was reduced in *fat-1* mice before and after LPS challenge. (e) In addition, active  $NF-\kappa B$  was determined by ELISA after stimulation of isolated alveolar type II epithelial cells with  $TNF-\alpha$ . The increase in active  $NF-\kappa B$  was higher and more prolonged in WT mice. Data are given as mean  $\pm$  SEM, n = 4 independent experiments each. \$, p < 0.05 vs. baseline; \*, p < 0.05 vs. *fat-1* group.

Figure E3

a)

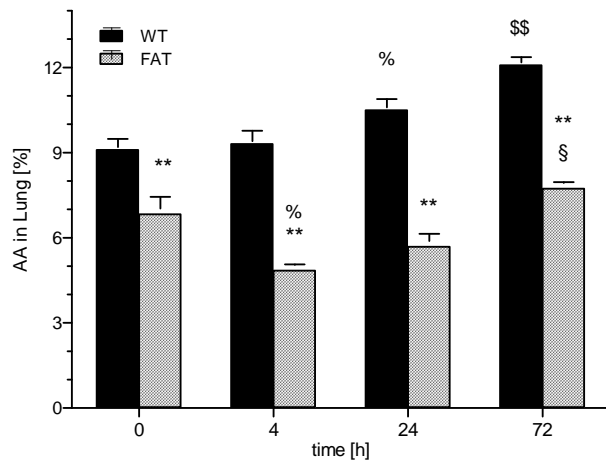

b)

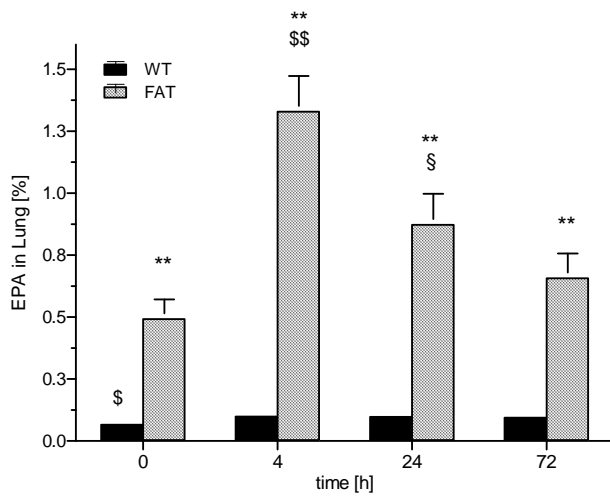

c)

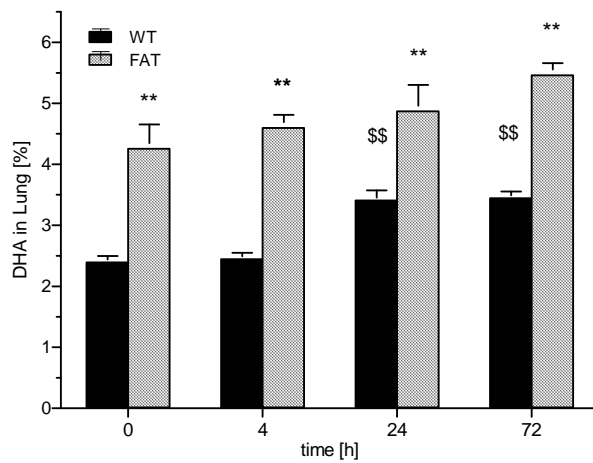

Figure E3: *fat-1* mice and fatty acids in lung tissue in a model of acute lung injury.

Fatty acids were determined after lipid extraction from lung tissue. (a) Arachidonic acid (AA) levels were higher in WT mice compared to *fat-1* mice at baseline. The AA increased after LPS instillation, and levels were highest after 72 h in the WT group, reaching significance after 24 h (% ,  $p < 0.05$  vs. baseline). The AA levels at 72 h were higher compared to all other time points (\$\$,  $p < 0.01$ ). In *fat-1* mice, AA was decreased 4 h after LPS challenge (% ,  $p < 0.05$  vs. baseline) and increased thereafter, reaching baseline levels after 72 h (\$ ,  $p < 0.05$  vs. 4 and 24 h). Both groups differed significantly at every time point (\*\*,  $p < 0.01$ ).

(b) Eicosapentaenoic acid (EPA) levels were higher in *fat-1* mice as compared to WT animals at baseline. In both groups, EPA levels peaked at 4 h, and subsequently declined, nearly returning to baseline levels at 72 h. Peak EPA levels at 4 h differed significantly from all other time points in the *fat-1* group (\$\$,  $p < 0.01$ ). In this group, after 24 h, the increase in EPA levels was still different from baseline (\$ ,  $p < 0.05$ ). Baseline EPA levels were lower compared to all other time points in WT mice (\$ ,  $p < 0.05$ ). Both groups differed significantly at every time point (\*\*,  $p < 0.01$ ).

(c) Docosahexaenoic acid (DHA) levels steadily increased after LPS challenge. In the WT group, DHA levels at 24 and 72 were significantly higher compared to the baseline and 4 h values (\$\$,  $p < 0.01$ ). At all time points, DHA levels in *fat-1* mice were higher than in WT animals (\*\*,  $p < 0.01$ ).
